# Supplementary material for: An efficient PEDOT-coated textile for wearable thermoelectric generators and strain sensors
Source: Royal Society of Chemistry journal article supplement (doi:10.1039/c8tc05906c), 2019-01-01
Supplement: c8tc05906c1.pdf [file c8tc05906c1.pdf]

## Electronic Supplementary Information

### **An efficient PEDOT-coated textile for wearable thermoelectric generators and strain sensors**

Yanhua Jia,<sup>a</sup> Lanlan Shen,<sup>a</sup> Jing Liu,<sup>a</sup> Weiqiang Zhou,<sup>a</sup> Yukou Du,<sup>b</sup> Jingkun Xu,<sup>\*a,b</sup>

Congcong Liu,<sup>a</sup> Ge Zhang,<sup>a</sup> Zishan Zhang,<sup>a</sup> Fengxing Jiang<sup>\*a</sup>

<sup>a</sup>Department of Physics, Jiangxi Science and Technology Normal University, Nanchang 330013, P. R. China

<sup>b</sup> College of Chemistry, Chemical Engineering and Materials Science, Soochow University, Suzhou 215123, P. R. China

<sup>c</sup> College of Chemistry and Molecular Engineering, Qingdao University of Science & Technology, Qingdao 266042, P. R. China

\*The corresponding authors, email: xujingkun@tsinghua.org.cn (J. Xu), and f.x.jiang@live.cn (F. Jiang)

### **Preparation of n-type CNTs paper**

The p-type carbon nanotubes (CNTs) paper was obtained from Nanjing Xianfeng Nano Co. The n-type CNT paper doping was based on a previously published procedure that 5 vol. % polyethyleneimine (PEI) and  $\text{NaBH}_4$  (0.378 g) were added to the deionized water (10 mL), and then the n-type CNTs paper was placed on mixture solution for 48 h. Finally, the sample washed with DI water and dried in air at 50 °C.<sup>1</sup>

### Different Strain

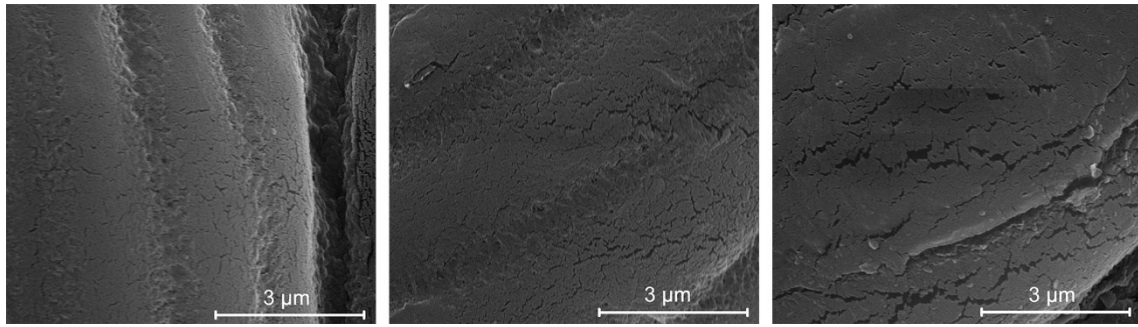

**Fig. S1.** SEM images of the MT@PEDOT with (d) 0%, (e) 30%, and (f) 50 % strain.

## Raman Spectra

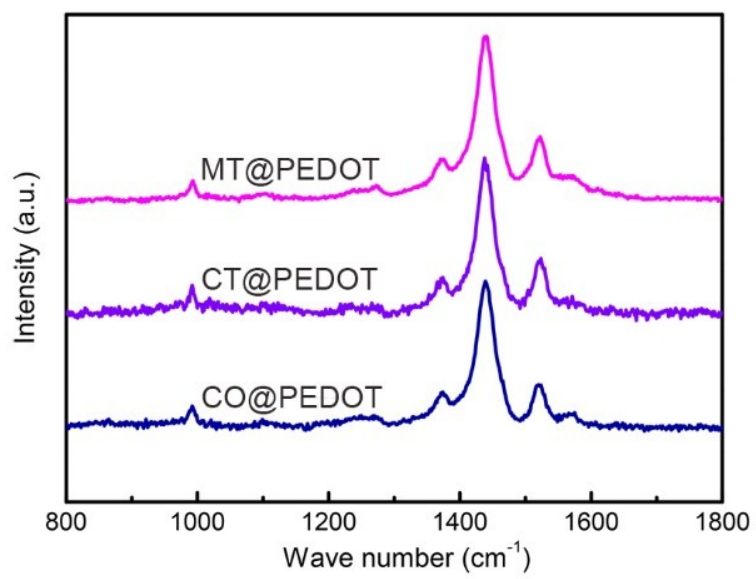

**Fig. S2.** Raman of PEDOT-coated electronic textiles.

### Resistance dependence on deposition times of VPP-PEDOT textile

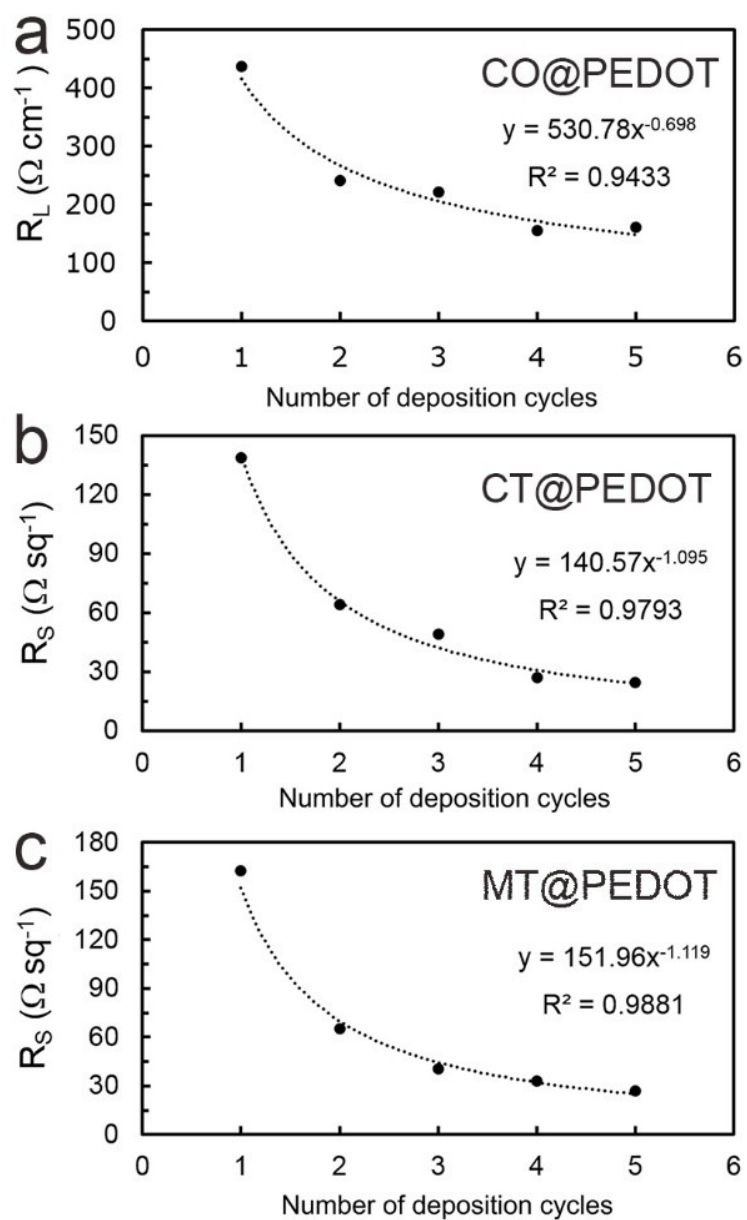

**Fig. S3.** Fitted curve of number of deposition cycle: (a) CO@PEDOT, (b) CT@PEDOT, and (c) MT@PEDOT.

### Resistance and GF dependence on strain of MT@PEDOT

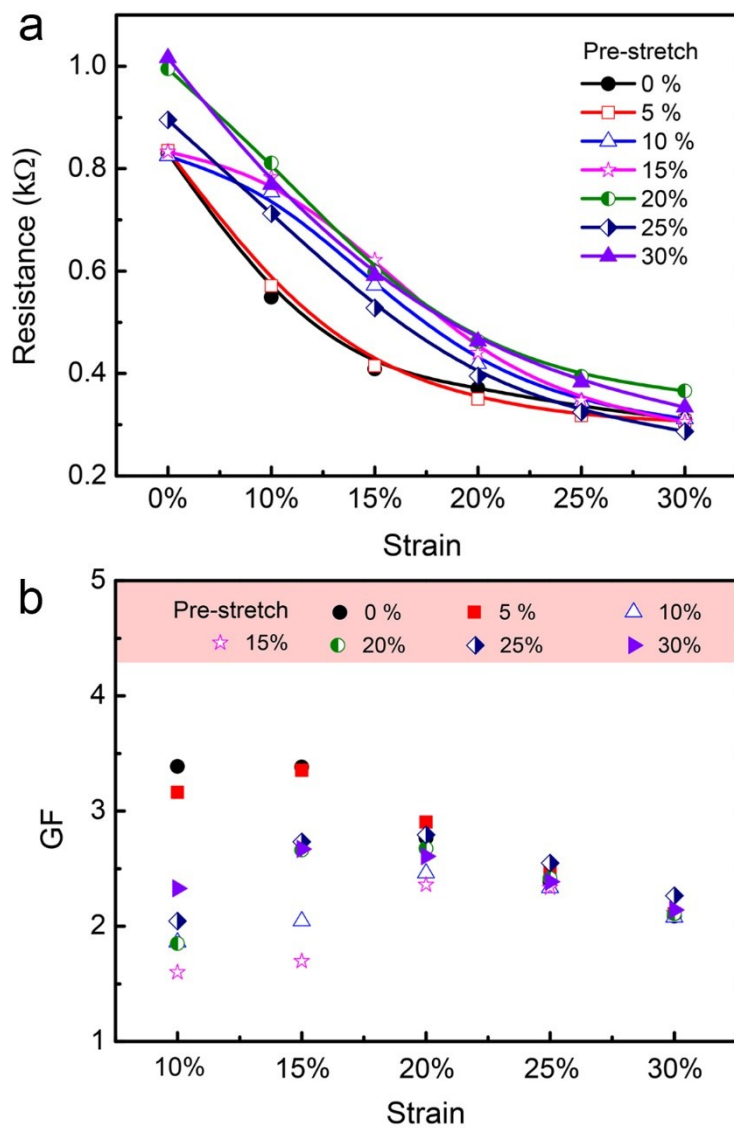

**Fig. S4.** Strain-dependent (a) resistance and (b) GF of MT@PEDOT strain sensors with different pre-stretch.

### The doping level change Of PEDOT coating with heat treatment

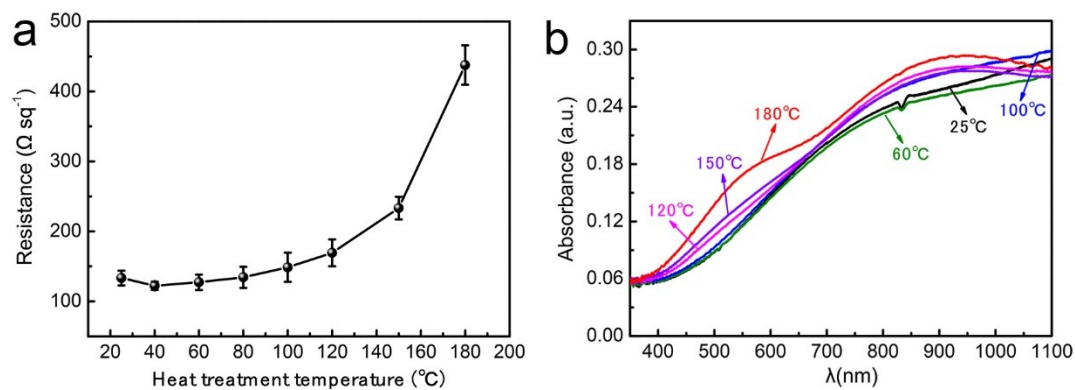

**Fig.S5** The sheet resistance (a) and UV–Vis–NIR spectra (b) of PEDOT coating on glass substrate with different heat treatment temperature.

## MT@PEDOT with heat treatment

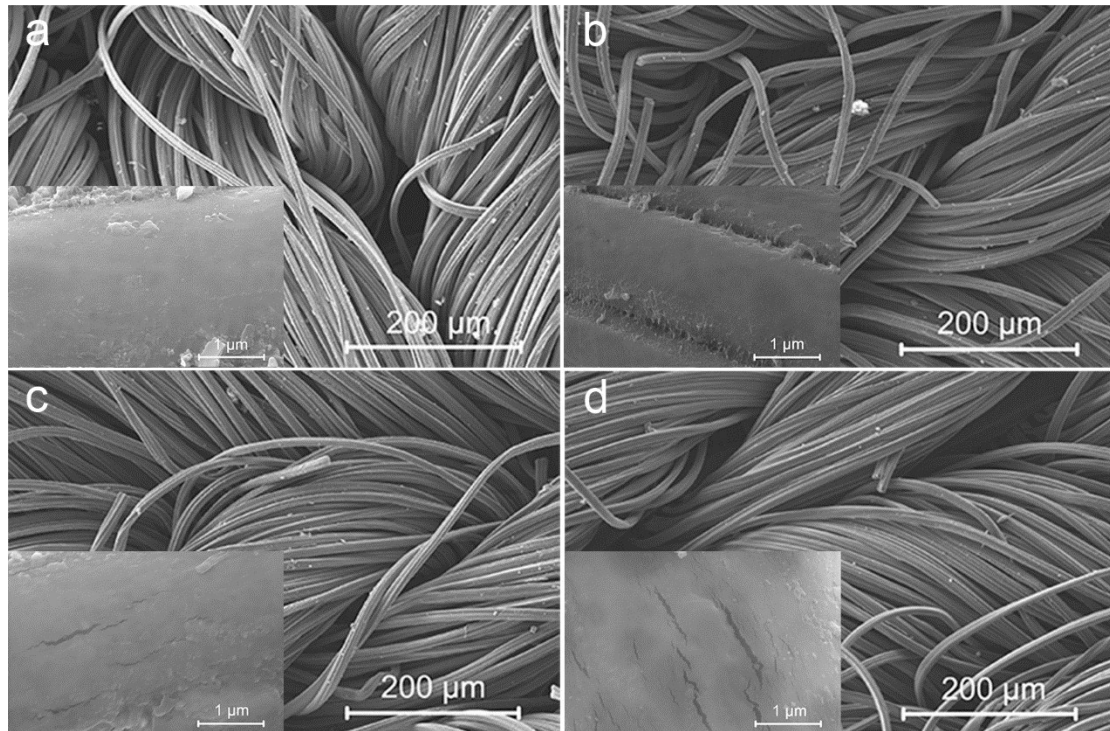

**Fig. S6** SEM images of the MT@PEDOT with different heat treatment temperature: (a). 25 °C, (b) 60 °C, (c) 100 °C, (d) 180 °C.



### The change of resistance at low temperature

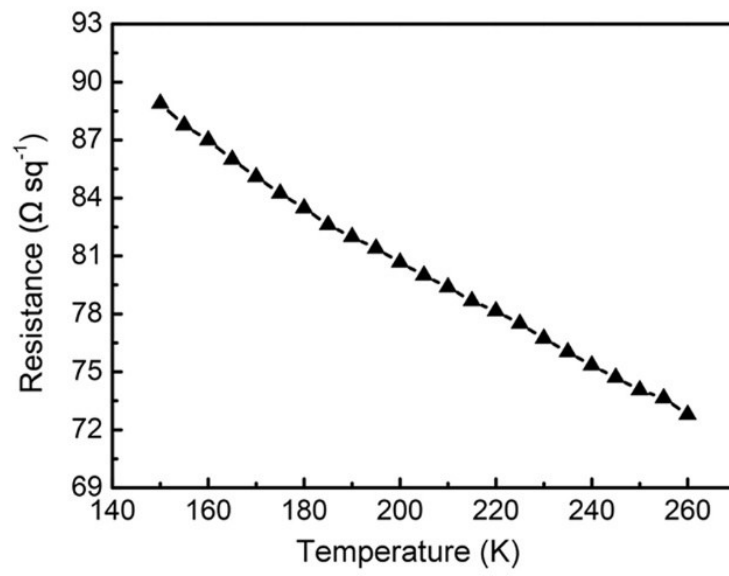

**Fig.S7** The sheet resistance of MT@PEDOT with different temperature.

**GF dependence on strain of MT@PEDOT with different number of deposition cycles**

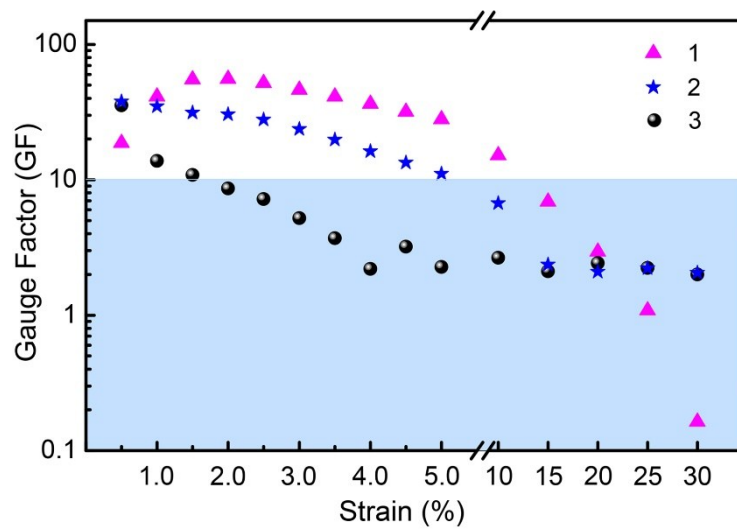

**Fig. S8.** Strain-dependent Gauge factor (GF) of MT@PEDOT strain sensors with different number of deposition cycles;

### Resistance dependence on strain of MT@PEDOT

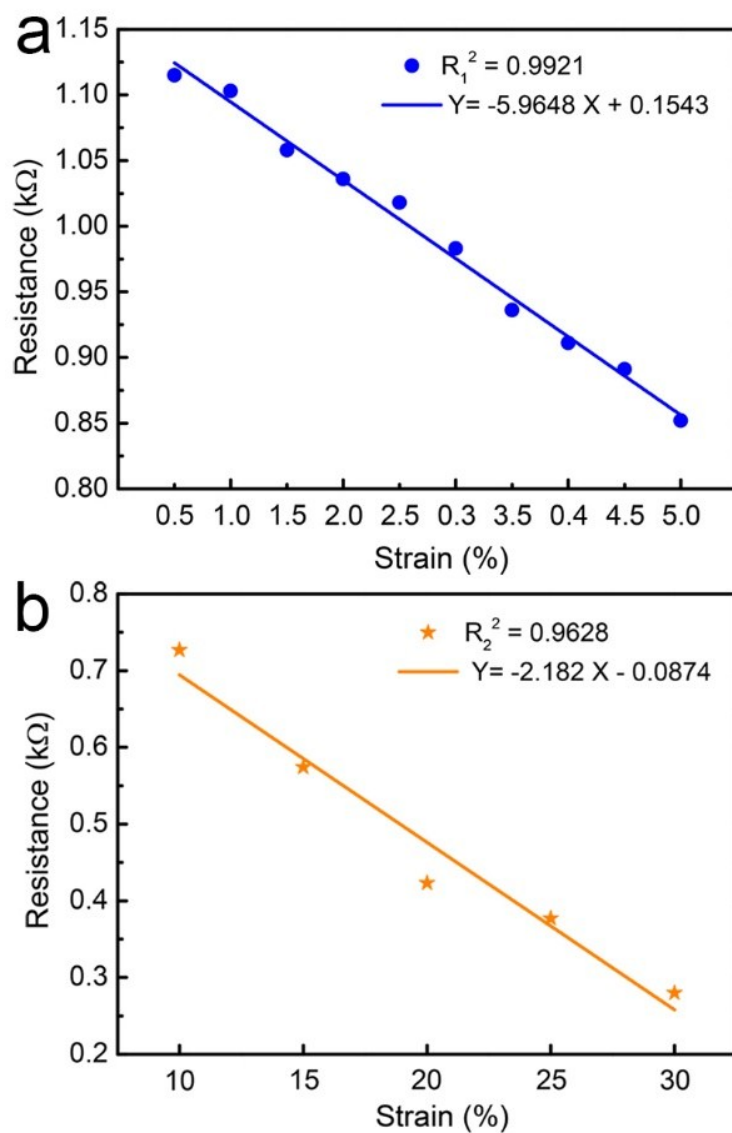

**Fig. S9.** The linear regression equation of MT@PEDOT of strain dependent resistance with strain (a) 0.5-5 % and (b) 10-30 %.

### Resistance dependence on stretch times

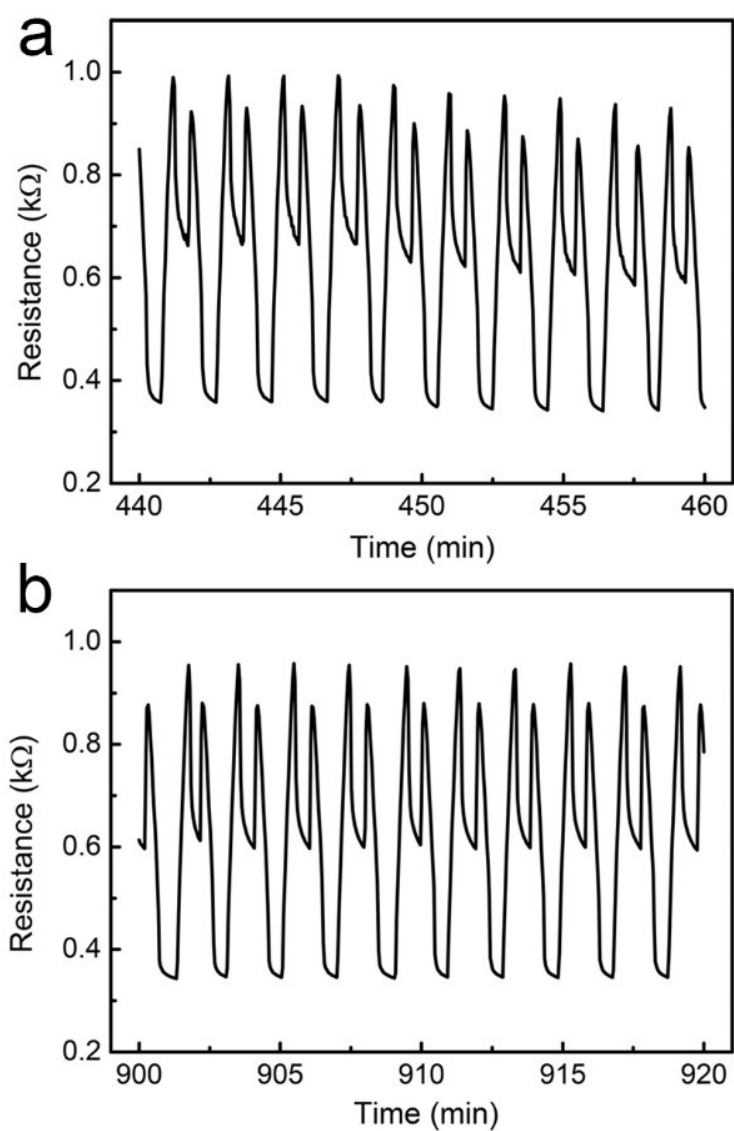

**Fig. S10.** Cyclic stretch/release test data of MT@PEDOT with different time: (a) 440-460 min and (b) 900-920 min.

## Microstructure change

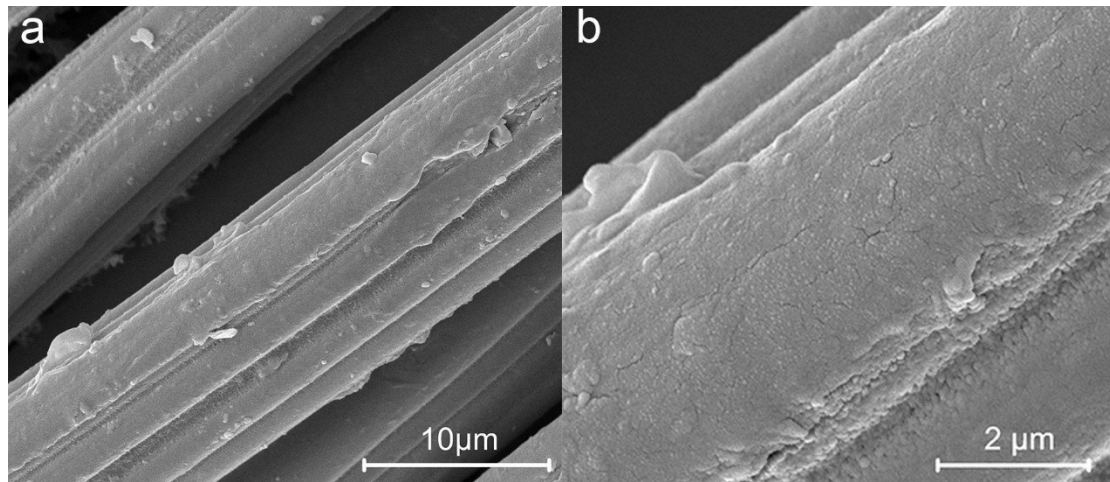

**Fig. S11.** SEM images of the MT@PEDOT after 500 cyclic loading.

## Notes and references

1 C. Yu, A. Murali, K. Choi, Y. Ryu, *Energy Environ. Sci.*, 2012, **5**, 9481-9486.
